# Supplementary material for: Thermo-osmotic energy conversion and storage by nanochannels
Source: Royal Society of Chemistry journal article supplement (doi:10.1039/c9ta08992f), 2019-01-01
Supplement: c9ta08992f1.pdf [file c9ta08992f1.pdf]

Supporting Information

## **Thermo-Osmotic Energy Conversion and Conservation by Nanochannels**

*Kexin Chen<sup>†,a</sup>, Lina Yao<sup>†,a</sup>, Fei Yan<sup>b</sup>, Shanshan Liu<sup>a</sup>, Rongjie Yang<sup>a</sup> and Bin Su<sup>\*a</sup>*

a. Institute of Analytical Chemistry, Department of Chemistry, Zhejiang University, Hangzhou 310058, China

b. Department of Chemistry, Zhejiang Sci-Tech University, 928 Second Avenue, Xiasha Higher Education Zone, Hangzhou 310018, China

### **Table of Contents**

S1. Materials and Reagents

S2. Measurements and Characterizations

S3. Preparation of SNC/PET Hybrid Nanochannels

S4. Fabrication of Hybrid Nanochannels and *I-V* Responses

S5. *I-V* Responses of Nanochannels under Salinity Gradient

S6. The Energy Conversion Performance of PET Membrane

S7. Numerical Simulations

## **S1. Materials and Reagents**

All chemicals and reagents were used as received without further purification. All aqueous solutions were prepared with ultrapure water (18.2 M $\Omega$  cm). Tetraethoxysilane (TEOS,  $\geq$  99.0%), cetyltrimethylammonium bromide (CTAB,  $\geq$  98%), poly(methyl methacrylate) (PMMA, Mw = 996000) were purchased from Sigma-Aldrich. Potassium chloride (KCl, AR) and sodium chloride (NaCl, AR) were bought from Sinopharm Chemical Reagent.

ITO coated glass (surface resistivity < 17 ohm/square, thickness 100  $\pm$  20 nm) was ordered from Zhuhai Kaivo (Zhuhai, China). Prior to use, ITO was treated with 1 M NaOH solution, and then sonicated in acetone, ethanol, and deionized water sequentially. Ion-tracked PET membrane (12  $\mu$ m in thickness; ion-track density: 10<sup>8</sup> cm<sup>-2</sup>) was purchased from Wuwei Kejin Xinfu Co. Ltd.

## **S2. Measurements and Characterizations**

Transmission electron microscopy (TEM, HT7700, Hitachi) and scanning electron microscopy (SEM, SU-8010 field-emission scanning electron microscope, Hitachi) were employed to characterize the morphology and structures of SNC/PET hybrid nanochannels. Ionic current measurement was carried out with Keithley 6847 picoammeter (Keithley Instruments, Cleveland). A pair of Ag/AgCl electrodes were used to supply voltage and measure the current.

The thermoelectric response was recorded by a custom-made setup. Briefly, a micro ceramic heater (Zhuhai Huiyou Electronics, China) was employed to regulate the temperature of one solution. A DC power (QJ6003S, Ningbo Jiuyuan Electronics, China) was connected to the heater to control the heating rate and temperature range. A pair of temperature microsensors (PT100, Tenghui Wenkong Instruments, China) were immersed in two solutions to measure the instantaneous temperature. The temperature and its change were real-time recorded and stored with a temperature sensor (THMA temperature recorder, Tenghui Wenkong Instruments, China). The measurement accuracy and working range of the temperature sensor are  $\pm 0.15$  K and  $-173.15 - 533.15$  K, respectively. The trans-nanochannel potential was synchronously collected by an Autolab electrochemical workstation (PGSTAT302N, Metrohm) using two Ag/AgCl electrodes. The time resolutions of temperature recorder and trans-nanochannel potential are 1 s and 0.25 s, respectively.

### **S3. Preparation of SNC/PET Hybrid Nanochannels**

**Preparation of SNC Membrane.** SNC was firstly grown on the ITO glass using the Stöber-solution growth approach.<sup>S1</sup> Briefly, the bare ITO glasses were immersed in the precursor solution containing 70 mL water, 30 mL ethanol, 0.16 g CTAB, 10  $\mu$ L concentrated ammonia aqueous solution and 80  $\mu$ L TEOS. After 24 h under the quiescent condition at 60 °C, SNC with CTAB micelles confined in silica nanochannels was formed on the ITO surface (namely CTAB@SNC/ITO), and then aged at 100 °C overnight. The CTAB micelles in the silica nanochannels were removed by immersing the CTAB@SNC/ITO in 0.1 M HCl ethanol solution for 15 min under stirring to obtain micelle-free electrode (namely SNC/ITO).

**Preparation of PET with Conical Nanochannels.** Poly(ethylene terephthalate) membrane (PET, thickness: 12  $\mu$ m, pore density:  $10^8$  pores  $\text{cm}^{-2}$ ), irradiated with heavy ions, was treated by UV light (at 254 nm) for 1 h before etching. The PET membrane was subsequently chemically etched from one side by 9 M NaOH solution, whereas the other side was put in contact with stopping solution containing 1 M KCl and 1 M HCOOH as neutralization agents. The etching process was performed at about 303 K and the trans-membrane ionic current at voltage of 1 V was monitored. The etching was stopped when an obvious current increase was observed.

**Preparation of SNC/PET Hybrid Nanochannels.** SNC/PET hybrid nanochannels membrane was prepared using the PMMA-assisted transfer approach as previously reported.<sup>S2</sup> Briefly, PMMA solution (3.5% wt in anisole) was spin-coated on the top surface of SNC/ITO at 2000 rpm for 30 s. After solvent evaporation at room temperature for 1 h and heating at 115 °C for 15 min, the obtained PMMA protected SNC/ITO was treated with 2 M HCl to etch the ITO layer and the free-standing PMMA/SNC was obtained. Subsequently, a piece of PET membrane with conical nanochannels was used as the substrate to fish out the free-standing PMMA/SNC. Finally, the top PMMA layer was dissolved in the mixture of toluene and acetone (V/V

= 10/1) for 24 h to obtain the hybrid nanochannel membrane with perforated channels. The morphology structure of SNC/PET is illustrated in **Figure 1**.

**EDS analysis of PET membrane and SNC/PET membrane.** In order to further confirm the cross-section structure of SNC/PET membrane, we did energy dispersive x-ray analysis (EDS) as an assisted proof. **Figure S1a, c** shows the top-view SEM images of PET and SNC/PET membranes, in which the square areas were scanned for EDS analysis. As displayed in **Figure S1b**, Si element was barely detected for bare PET membrane. In contrast, in **Figure S1d**, an obvious amount of Si element can be detected for SNC/PET one, indicating the attachment of SNC to PET.

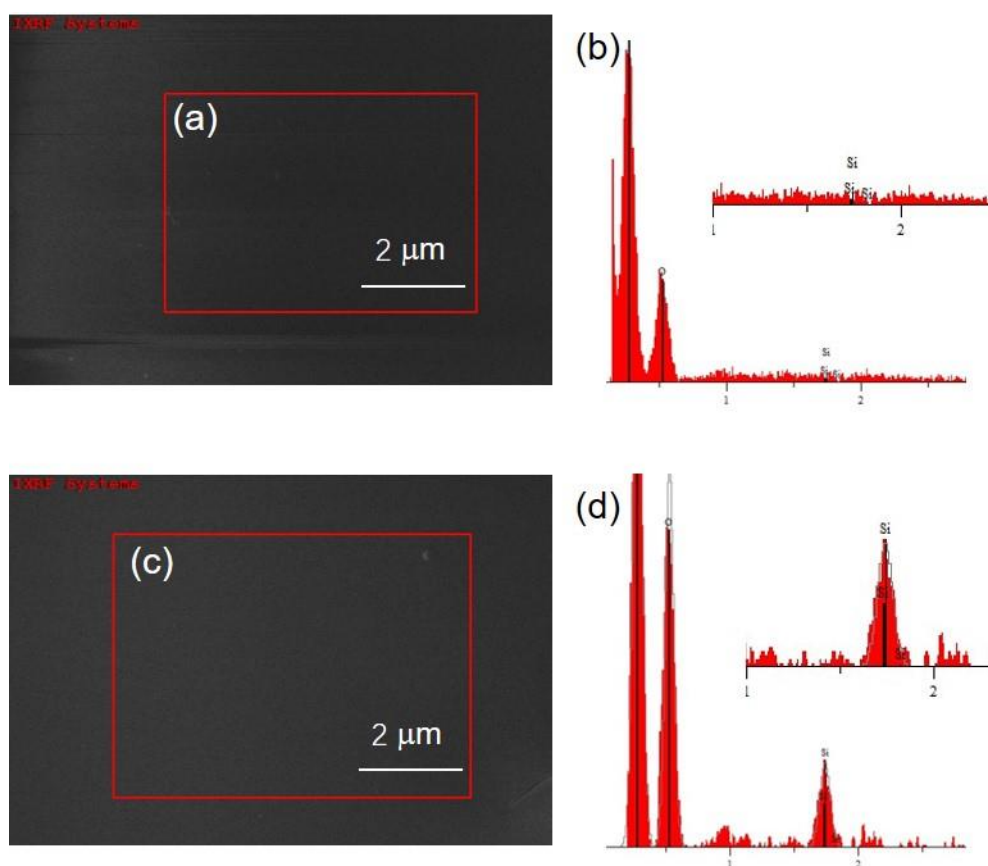

**Figure S1.** Top-view SEM images of PET membrane (a) and SNC/PET membrane (c) and the corresponding EDS analysis.

#### S4. *I-V* Responses of Nanochannels

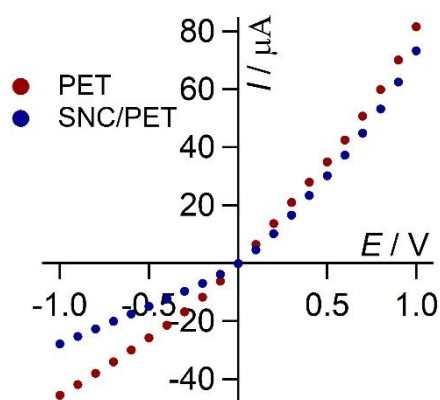

**Figure S2.** Comparison of *I-V* responses of PET conical nanochannels (red) and SNC/PET hybrid nanochannels (blue) in 10 mM KCl.

**Figure S2** compares the current-voltage (*I-V*) characteristic of PET conical nanochannels and SNC/PET hybrid nanochannels in 10 mM KCl. Apparently, an enhanced ionic current rectification was observed, with the rectification ratio ( $|I_{+1.0\text{ V}}/I_{-1.0\text{ V}}|$ ) increased from 1.9 to 2.6, confirming the successful preparation of layered nanochannel structure. Moreover, the ionic current did not decrease drastically (from 81.6  $\mu\text{A}$  to 73.3  $\mu\text{A}$  at +1.0 V) after SNC was adhered to PET nanochannels, indicating that silica nanochannels have a negligible effect on the ion permeability thanks to its high pore density.

## S5. *I-V* Responses of Nanochannels under Salinity Gradient

To study the performance of energy conversion by SNC/PET hybrid nanochannels. We investigated the *I-V* responses of SNC/PET under a salinity gradient (0.5 M/0.01 M NaCl). From blue line in **Figure S3**, the salinity gradient is from SNC to PET (namely  $c_{b-PET}/c_{b-SNC} = 0.01 \text{ M}/0.5 \text{ M}$ ),  $V_{oc}$  and  $I_{sc}$  obtained are 162.8 mV and 20.1  $\mu\text{A}$ , respectively. Whereas under reversed salinity gradient from PET to SNC (namely  $c_{b-PET}/c_{b-SNC} = 0.5 \text{ M}/0.01 \text{ M}$ ), the internal resistance of hybrid nanochannels is increased by 49.3%, arising from the opposite direction between the salinity gradient and the preferential direction of cation transport.

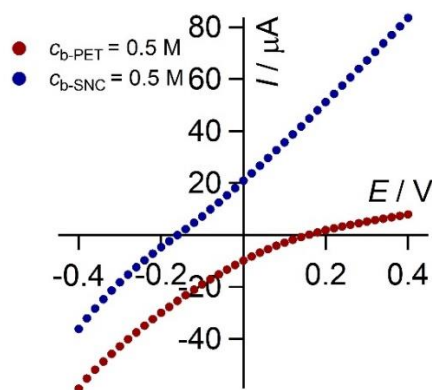

**Figure S3.** Measured *I-V* curves of SNC/PET hybrid nanochannels for  $c_{b-SNC} = 0.5 \text{ M}$  and  $c_{b-PET} = 0.01 \text{ M}$  (blue line) and in the concentration gradient reversed condition (red line).

As reported previously, the trans-nanochannel diffusion potential ( $E_{diff}$ ) can be calculated by the following equation,<sup>S3-S4</sup>

$$E_{diff} = V_{oc} - E_{red} = (2t_+ - 1) \frac{RT}{F} \ln \left( \frac{c_H}{c_L} \right) \quad (S1)$$

$$\eta_{max} = \frac{(2t_+ - 1)^2}{2} \quad (S2)$$

where  $t_+$  is the transference number of cationic ions and  $\eta$  the energy conversion efficiency.  $E_{red}$  is the difference of redox potentials of two Ag/AgCl electrodes. To

measure  $E_{\text{red}}$ , a home-made saturated salt bridge was used. The measured value of  $E_{\text{red}}$  is about 83.18 mV. Then  $t_+$  can be calculated as 0.98, indicating a high cationic selectivity of SNC/PET hybrid nanochannels.

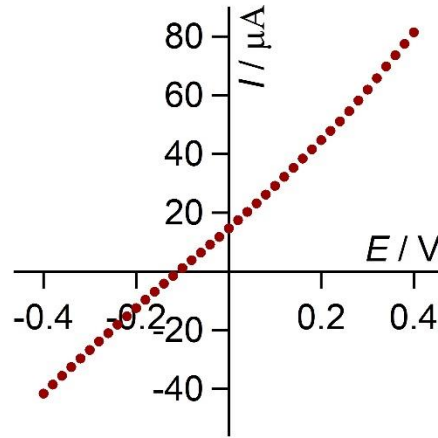

**Figure S4.** Measured  $I$ - $V$  curve of PET conical nanochannels under a salinity gradient ( $c_{\text{b-tip}}/c_{\text{b-base}} = 0.5 \text{ M}/0.01 \text{ M NaCl}$ ).

In order to further confirm the role of SNC in energy conversion, we measured the performance of energy conversion of PET conical nanochannels. As shown in **Figure S4**,  $V_{\text{oc}}$  obtained is 106.5 mV. According to **eq. S1**,  $E_{\text{diff}}$  of PET membrane in this condition is 23.32 mV, the corresponding  $t_+$  can be calculated as 0.62, indicating the membrane only possesses a slightly cationic selectivity. It also suggests that the highly cationic selectivity mainly originates from SNC.



### S6. The Energy Conversion Performance of PET Membrane

In order to show the effect of SNC on electricity conversion, we tested the current density ( $j$ ) and power density ( $P_R$ ) of PET membrane under simulated seawater (0.5 M NaCl) and river water (0.01 M NaCl). As shown in **Figure S5**,  $j$  gradually decreased with the increase of  $R_L$ , the initial value is about  $10.7 \text{ A m}^{-2}$ . While  $P_R$  increased at first and then decreased after reaching a maximum, where  $R_L$  was  $\sim 20 \text{ k}\Omega$ . The maximum of  $P_R$  is about  $124.6 \text{ mW m}^{-2}$ . Compared to the performance of SNC/PET membrane (**Figure 2a**), these results demonstrate energy conversion performance is mainly dependent on SNC membrane.

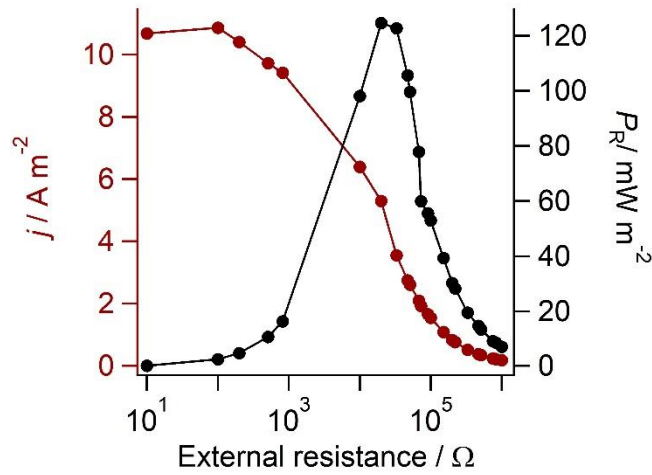

**Figure S5.** The current density (in red) and output power density (in black) of PET membrane as a function of the external load resistance.

## S7. Numerical Simulations

Simulations of salinity gradient energy storage by SNC/PET nanochannel were carried out by the commercial finite-element software COMSOL Multiphysics 5.2. For simplicity, a 2D axis symmetric model was employed in this system, as shown in **Figure S6**.

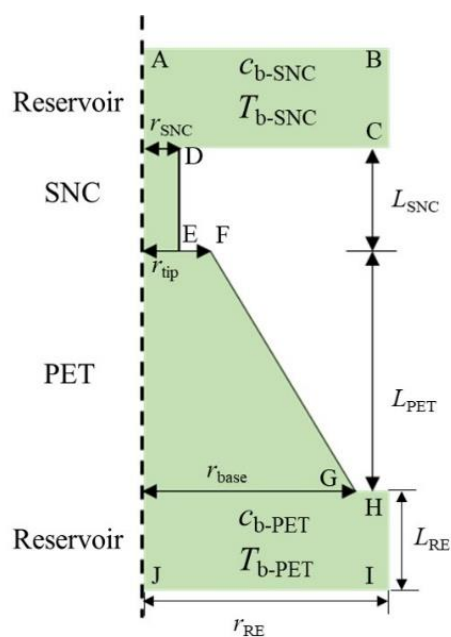

**Figure S6.** Scheme of 2D axial symmetric model with labeled boundaries (not to scale).

Here a conically-shaped PET channel with a tip opening radius of  $r_{\text{tip}} = 7$  nm, a base opening radius of  $r_{\text{base}} = 400$  nm, and a channel length of  $L_{\text{PET}} = 12000$  nm is considered. The SNC is positioned on the side of tip, which consists of nanochannels with a radius of  $r_{\text{nanochannel}} = 1.15 - 5$  nm and a length of  $L_{\text{nanochannel}} = 100$  nm. The surface charge density of PET channel ( $\sigma_{\text{PET}}$ ) and SNC nanochannel ( $\sigma_{\text{SNC}}$ ) are set to be  $-0.002$  C/m<sup>2</sup> and  $-0.015$  C/m<sup>2</sup>, respectively. This SNC/PET hybrid nanochannel is connected to two large identical reservoirs with dimensions of 100 times of  $r_{\text{base}}$ , which are filled with aqueous NaCl solutions. The boundary conditions in numerical simulation are summarized in **Table S1**.

**Table S1.** Boundary conditions for 2D axis symmetric model.

| Boundary | Poisson equation                                           | Nernst-Planck equation                                  |
|----------|------------------------------------------------------------|---------------------------------------------------------|
| AB       | applied voltage, $\phi = V$                                | bulk concentration<br>$c_+ = c_- = c_{b-SNC}$           |
| JI       | grounded, $\phi = 0$                                       | bulk concentration<br>$c_+ = c_- = c_{b-PET}$           |
| BC       | $-\mathbf{n} \cdot \nabla \phi = 0$                        | bulk concentration<br>$c_+ = c_- = c_{b-SNC}$           |
| HI       | $-\mathbf{n} \cdot \nabla \phi = 0$                        | bulk concentration<br>$c_+ = c_- = c_{b-PET}$           |
| CD, GH   | $-\mathbf{n} \cdot \nabla \phi = 0$                        | ion-impenetrable<br>$\mathbf{n} \cdot \mathbf{j}_i = 0$ |
| DE, EF   | $-\varepsilon \mathbf{n} \cdot \nabla \phi = \sigma_{SNC}$ | ion-impenetrable<br>$\mathbf{n} \cdot \mathbf{j}_i = 0$ |
| GH       | $-\varepsilon \mathbf{n} \cdot \nabla \phi = \sigma_{PET}$ | ion-impenetrable<br>$\mathbf{n} \cdot \mathbf{j}_i = 0$ |

$\mathbf{n}$ : the unit outer normal vector.

The coupled Poisson-Nernst-Planck (PNP) and Einstein-Stokes equations are employed to quantitatively describe the ionic mass transport process,

$$\nabla^2 \phi = -\frac{\rho}{\varepsilon} = -\frac{F}{\varepsilon} \sum z_i c_i \quad (S1)$$

$$\mathbf{j}_i = -D_i \left( \nabla c_i + \frac{z_i F c_i}{RT} \nabla \phi \right) \quad (S2)$$

$$\nabla \cdot \mathbf{j}_i = 0 \quad (S3)$$

$$D_i = \frac{k_B T}{6\pi\eta r} \quad (S4)$$

where

$\phi$  [V]: electric potential;

$\rho$  [C/m<sup>3</sup>]: space charge density;

$\mathbf{j}_i$  [mol/(m<sup>2</sup> s)]: ionic flux;

$z_i$  [-]: charge number;

$c_i$  [M]: ion concentration;

$D_i$  [m<sup>2</sup>/s]: diffusion coefficient;

$\varepsilon = 78.5$  [F/m]: dielectric constant of water;

$F$  [C/mol]: Faraday constant;

$R$  [J/K/mol]: gas constant;

$k_B$ : Boltzmann constant;

$T$  [K]: absolute temperature;

$\eta$  [Pa\*s]: the dynamic fluid viscosity of water, expressed by a built-in piecewise function in COMSOL;

$r$  is the ion size (for  $\text{Na}^+$ ,  $r = 0.4$  nm; for  $\text{Cl}^-$ ,  $r = 0.3$  nm);<sup>5</sup>

$i = +$  (for  $\text{Na}^+$ );

$i = -$  (for  $\text{Cl}^-$ ).

The model was employed to evaluate the ability of energy storage of nanochannels and the role of temperature gradient played in energy storage. We plotted the profile of energy density ( $U_r$ ) along the radial direction of nanochannel before and after a temperature change of 10 K at the boundary of SNC and PET channel. The initial temperature of two solutions is set at 298.15 K ( $T_{b-SNC} = T_{b-PET} = 298.15$  K). As shown in **Figure S7**, the variation of  $U_r$  in response to temperature change is too small to recognize directly. Hence, we analyzed its variation, namely  $\Delta U_r$ , as shown in **Figure 4f**.

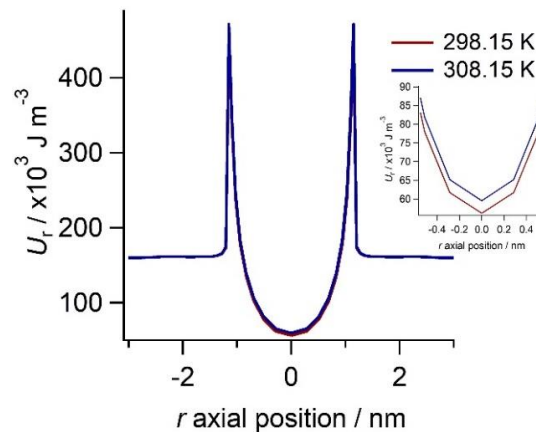

**Figure S7.** Calculated energy density along the radial direction of hybrid nanochannel.  $C_{b-PET}$  and  $C_{b-SNC}$  are set at 0.01 M and 0.5 M, respectively.  $T_{b-SNC}$  and  $T_{b-PET}$  are set at 298.15 K initially, then  $T_{b-PET}$  is increased by 10 K to 308.15 K and  $T_{b-SNC}$  is kept at 298.15 K. The inset shows the magnifications at the orifice of nanochannel.

## Reference

- S1 Z. Teng, G. Zheng, Y. Dou, W. Li, C.-Y. Mou, X. Zhang, A. M. Asiri, D. Zhao, *Angew. Chem. Int. Ed.* 2012, **51**, 2173.
- S2 W. Wu, Q. Yang, B. Su, *J. Membr. Sci.* 2018, **558**, 86.
- S3 W. Xin, Z. Zhang, X. Huang, Y. Hu, T. Zhou, C. Zhu, X.-Y. Kong, L. Jiang, L. Wen, *Nat. Commun.* 2019, **10**, 3876.
- S4 F. Yan, L. Yao, K. Chen, Q. Yang, B. Su, *Journal of Materials Chemistry A* 2019, **7**, 2385.
- S5 C. Duan, A. Majumdar, *Nat. Nanotechnol.* 2010, **5**, 848.
